# Supplementary material for: Photocatalytic conversion of 5-hydroxymethylfurfural to 2,5-diformylfuran by S-scheme black phosphorus/CdIn2S4 heterojunction
Source: Royal Society of Chemistry journal article supplement (doi:10.1039/d3cy01075a), 2023-01-01
Supplement: d3cy01075a1.pdf [file d3cy01075a1.pdf]

## Supporting Information

### Photocatalytic conversion of 5-hydroxymethylfurfural to 2,5-diformylfuran by S-scheme Black Phosphorus/ CdIn<sub>2</sub>S<sub>4</sub> heterojunction

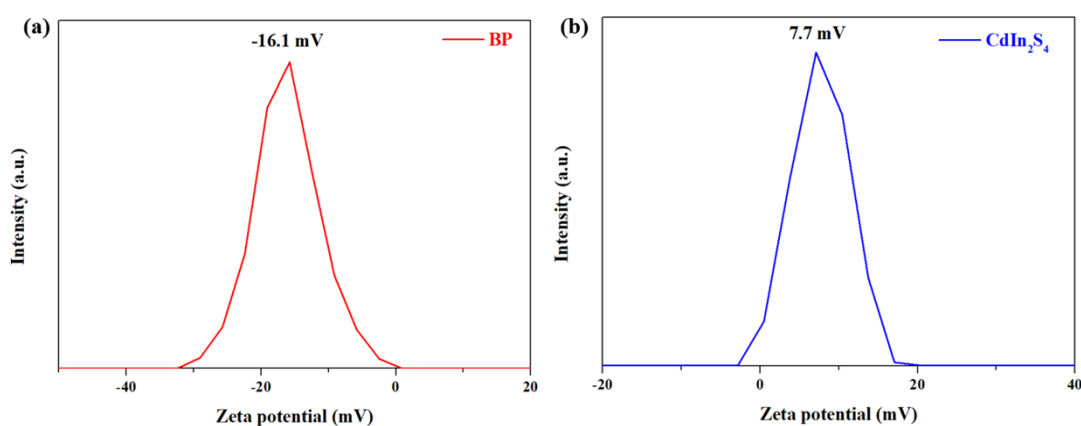

Fig. S1. Zeta potential of BP (a) and CdIn<sub>2</sub>S<sub>4</sub> (b)

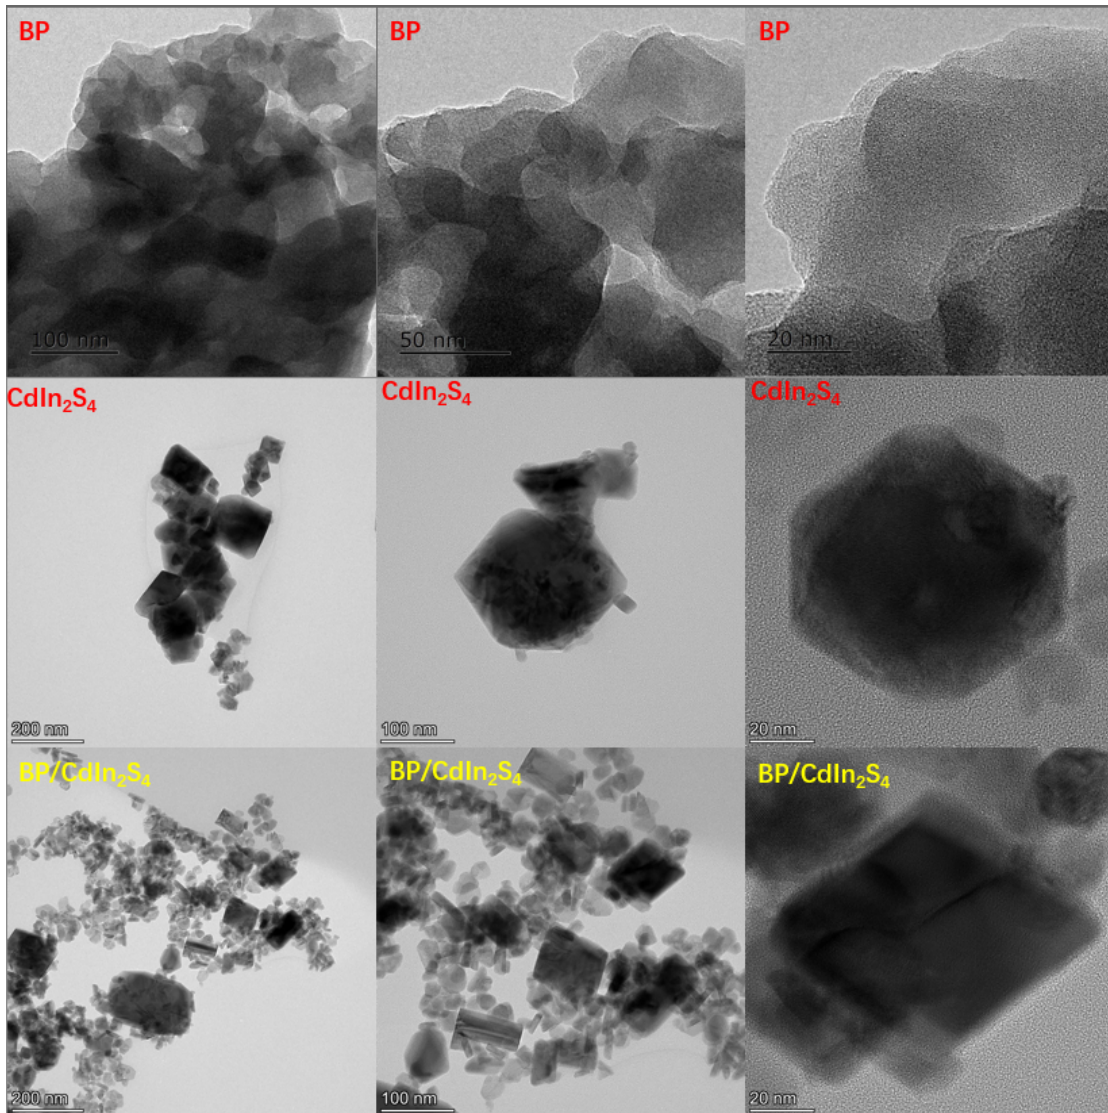

Fig. S2. TEM image of BP, CdIn<sub>2</sub>S<sub>4</sub> and BP/ CdIn<sub>2</sub>S<sub>4</sub>

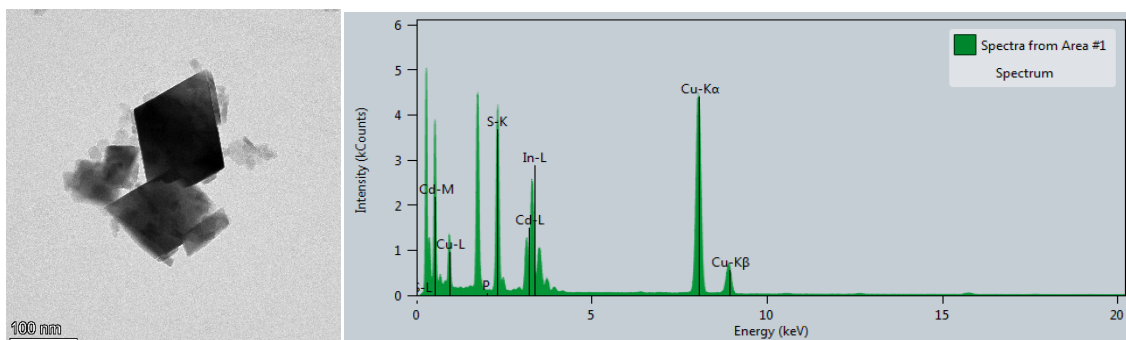

Fig. S3. EDS spectra of BP/ CdIn<sub>2</sub>S<sub>4</sub> heterojunction

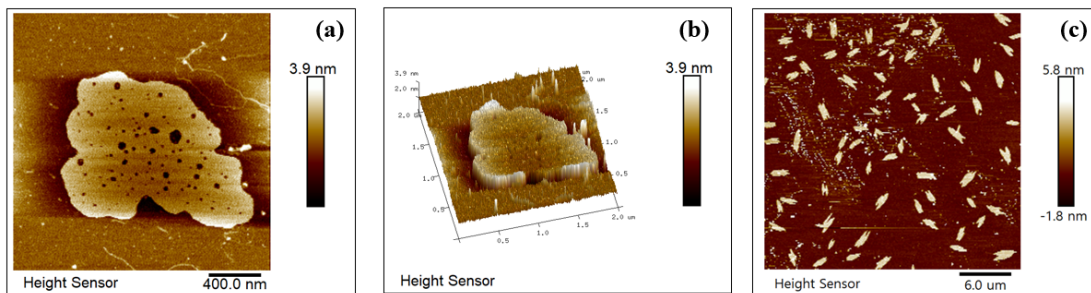

Fig. S4. AFM image of BP (a), (b) and BP/CdIn<sub>2</sub>S<sub>4</sub> (c)

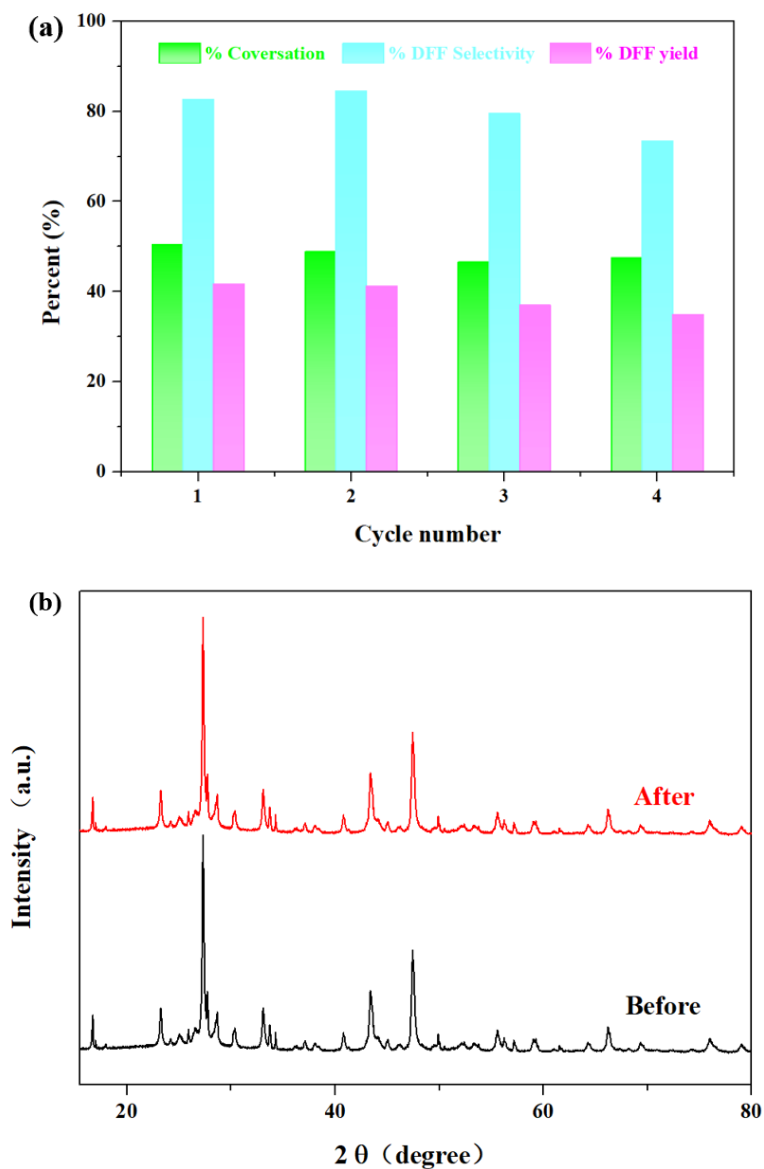

Fig. S5. Cycling runs in the photocatalytic oxidation of 5-HMF on the 1.5% BP/CdIn<sub>2</sub>S<sub>4</sub> catalyst under visible light irradiation (a), XRD spectrum of 1.5% BP/CdIn<sub>2</sub>S<sub>4</sub> sample before and after photocatalytic reaction.

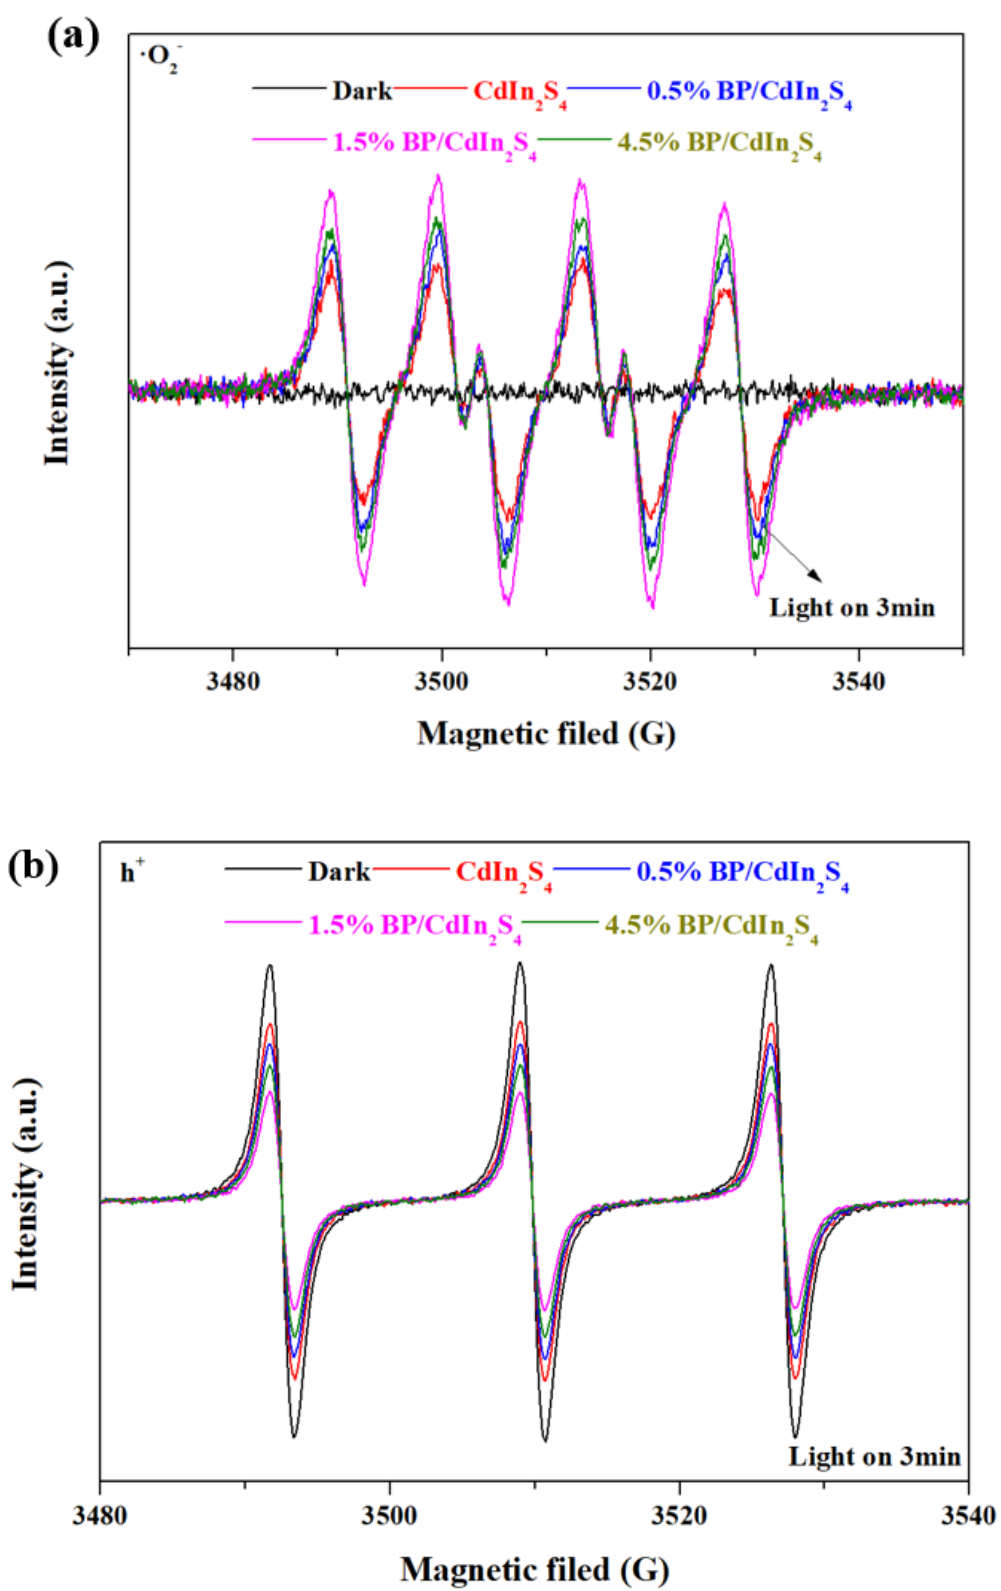

Fig. S6. EPR spectra: ·O<sub>2</sub><sup>-</sup> (a), h<sup>+</sup> (b).

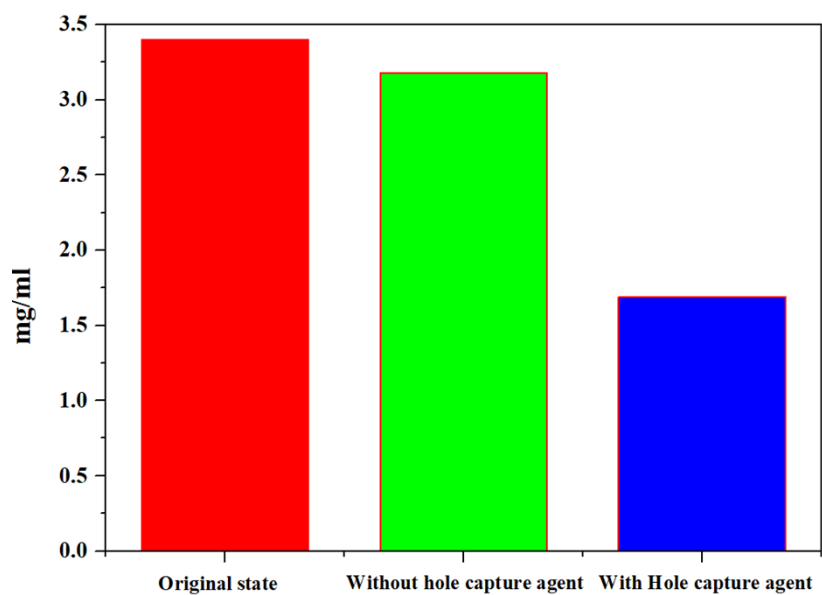

Fig. S7. The total organic carbon content of the system without and with a hole capture agent.

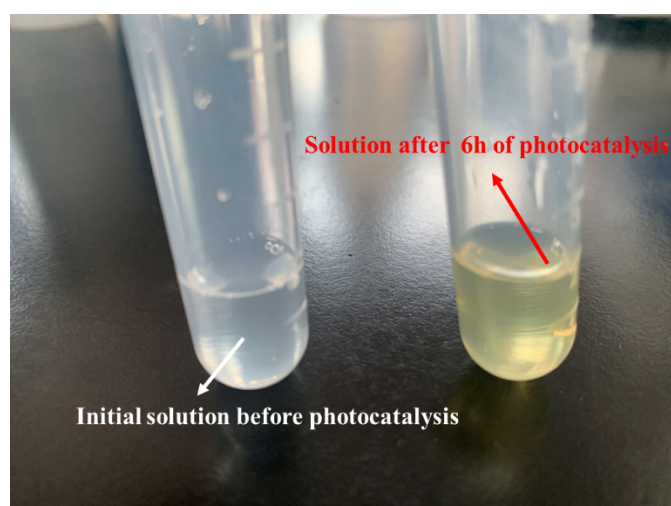

Fig. S8. Color reaction of  $H_2O_2$ .

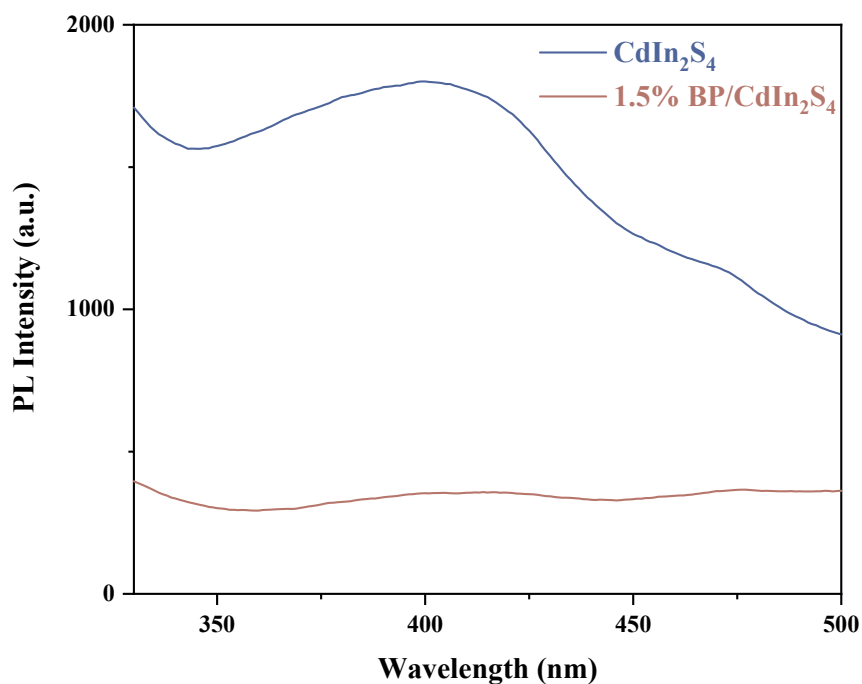

Fig. S9. Photoluminescence spectra of the CdIn<sub>2</sub>S<sub>4</sub> and 1.5% BP/ CdIn<sub>2</sub>S<sub>4</sub>.

**Table S1**

Comparison of herein reported HMF oxidation to DFF results with other photocatalysts with atmospheric oxygen as the oxidant

| Catalyst                                                       | Solvent               | Reaction conditions                                             | Conv. (%) | Select. (%) | Yield (%) | Ref.      |
|----------------------------------------------------------------|-----------------------|-----------------------------------------------------------------|-----------|-------------|-----------|-----------|
| BP/CdIn <sub>2</sub> S <sub>4</sub>                            | Water                 | 500 W Xe lamp<br>( $\lambda > 420$ nm), 20 °C, under air        | 50.4      | 82.5        | 41.6      | This work |
| Cd <sub>1.5</sub> In <sub>2</sub> S <sub>4.5</sub>             | Water                 | 500 W Xe lamp<br>( $\lambda > 420$ nm), 20 °C, under air        | 68.8      | 62.7        | 43.2      | [1]       |
| N-TiO <sub>2</sub>                                             | Water                 | 500 W lamp<br>( $\lambda = 365$ nm), 20 °C,<br>under air        | -         | 30.0-40.0   | -         | [2]       |
| g-C <sub>3</sub> N <sub>4</sub>                                | Water                 | Sunlight, 25 °C, under air                                      | 40.0      | 50.0        | 20.0      | [2, 3]    |
| g-C <sub>3</sub> N <sub>4</sub> -H <sub>2</sub> O <sub>2</sub> | Water                 | Sunlight, 20 °C, under air                                      | 20.0      | 88.0        | 17.6      | [4]       |
| WO <sub>3</sub> /g-C <sub>3</sub> N <sub>4</sub>               | ACN+PhCF <sub>3</sub> | Xe lamp<br>( $\lambda > 400$ nm), 30 °C, O <sub>2</sub> purging | 27.4      | 87.2        | 23.9      | [5]       |
| Zn <sub>x</sub> Cd <sub>1-x</sub> S-P                          | Water                 | Visible light                                                   | 40.0      | 65.0        | 26.0      | [6]       |
| Fe(III)/Bi <sub>2</sub> MoO <sub>6</sub>                       | Water                 | 500 W Xe lamp<br>( $\lambda > 400$ nm)                          | 32.6      | 95.3        | 31.1      | [7]       |

## References:

- [1] M. Zhang, Z. Yu, J. Xiong, R. Zhang, X. Liu, X. Lu, One-step hydrothermal synthesis of  $\text{Cd}_x\text{In}_y\text{S}_{(x+1.5y)}$  for photocatalytic oxidation of biomass-derived 5-hydroxymethylfurfural to 2, 5-diformylfuran under ambient conditions, *Appl. Catal. B*, 300 (2022) 120738. <http://dx.doi.org/10.1016/j.apcatb.2021.120738>
- [2] B. Zhou, J. Song, Z. Zhang, Z. Jiang, P. Zhang, B. Han, Highly selective photocatalytic oxidation of biomass-derived chemicals to carboxyl compounds over Au/TiO<sub>2</sub>, *GREEN CHEM*, 19 (2017) 1075-1081. <http://dx.doi.org/10.1039/C6GC03022J>
- [3] I. Krivtsov, E.I. García-López, G. Marci, L. Palmisano, Z. Amghouz, J.R. García, S. Ordóñez, E. Díaz, Selective photocatalytic oxidation of 5-hydroxymethyl-2-furfural to 2,5-furandicarboxyaldehyde in aqueous suspension of g-C<sub>3</sub>N<sub>4</sub>, *Appl. Catal. B*, 204 (2017) 430-439. <http://dx.doi.org/10.1016/j.apcatb.2016.11.049>
- [4] M. Ilkaeva, I. Krivtsov, E.I. García-López, G. Marci, O. Khainakova, J.R. García, L. Palmisano, E. Díaz, S. Ordóñez, Selective photocatalytic oxidation of 5-hydroxymethylfurfural to 2,5-furandicarboxyaldehyde by polymeric carbon nitride-hydrogen peroxide adduct, *J CATAL*, 359 (2018) 212-222. <http://dx.doi.org/10.1016/j.jcat.2018.01.012>
- [5] H. Zhang, Z. Feng, Y. Zhu, Y. Wu, T. Wu, Photocatalytic selective oxidation of biomass-derived 5-hydroxymethylfurfural to 2,5-diformylfuran on WO<sub>3</sub>/g-C<sub>3</sub>N<sub>4</sub> composite under irradiation of visible light, *J PHOTOCH PHOTOBIO A*, 371 (2019) 1-9. <http://dx.doi.org/10.1016/j.jphotochem.2018.10.044>
- [6] H. Ye, R. Shi, X. Yang, W. Fu, Y. Chen, P-doped Zn<sub>x</sub>Cd<sub>1-x</sub>S solid solutions as photocatalysts for hydrogen evolution from water splitting coupled with photocatalytic oxidation of 5-hydroxymethylfurfural, *Applied Catalysis B: Environmental*, 233 (2018) 70-79. <http://dx.doi.org/10.1016/j.apcatb.2018.03.060>
- [7] J. Xue, C. Huang, Y. Zong, J. Gu, M. Wang, S. Ma, Fe (III) - grafted Bi<sub>2</sub>MoO<sub>6</sub> nanoplates for enhanced photocatalytic activities on tetracycline degradation and HMF oxidation, *APPL ORGANOMET CHEM*, 33 (2019). <http://dx.doi.org/10.1002/aoc.5187>
